# Supplementary material for: Transcriptional states of CAR-T infusion relate to neurotoxicity – lessons from high-resolution single-cell SOM expression portraying
Source: Front Immunol. 2022 Sep 28;13:994885. doi: 10.3389/fimmu.2022.994885 (PMC9558919; doi:10.3389/fimmu.2022.994885)
Supplement: Supplementary file 1 [file Table_1.xlsx]

## Sheet: T cell subpopulations
p-values derived from Fisher's exact test		p < 0.1: *	p < 0.01: **	p < 0.001: ***
PATs	naive CD4+ T cells	naive CD8+ T cells	CD4+ Treg cells	CD8+ Treg cells	CD4+ Tcm cells	CD8+ Tcm cells	CD4+ Tem cells	CD8+ Tem cells	Th1 cells	Th2 cells	Th9 cells	Th17 cells	CD8+ Tc cells
a i	1	4 *	25 *	11	6 *	5	11 **	15	13	1	0	2	60
A I	1	2	29 *	11	9 *	9 *	6	25 *	14	1	0	2	111
b	0	13 ***	37	19	21 **	24 **	26 *	71 ***	39	0	0	1	290
B	8 **	15 **	133	56	38 ***	43 **	43 *	75	92	5	0	4	662
b a	0	7	99 **	36	19 *	28 **	34 **	53	62	3	0	6	386
B A	0	0	82 ***	24	9	11	24 *	21	75 ***	14	0	3	279
b a i	5 ***	3	49 *	19	12 *	12	14	20	34	2	1 *	4	172
B A I	2	1	66 **	19	12	11	11	28	65 ***	3	0	2	248
b c	1	0	18	8	6	4	13 *	34 ***	15	2	0	1	112
B C	0	3 **	5	3	2	3	4	12 **	2	1	0	1	39
b c a	2	2	71 ***	29	10	11	24 **	35	44	6	0	3	239
B C A	0	1	43 *	11	10 *	9	10	30 *	18	4	0	15 ***	158
b c a e	0	0	164 ***	61 ***	4	2	33 *	21	175 ***	23 *	0	25 ***	239
B C A E	0	0	81 ***	27	1	0	17	13	127 ***	30 ***	1	18 **	234
b c d	2	3	132 ***	46	29 ***	22	44 ***	37	69	15	1	18 *	376
B C D	1	3	61	21	3	9	34 **	57	68	28 ***	2 *	12	396
b c d a	3	10	858 ***	270	51	52	176	219	698 ***	186 ***	2	269 ***	2824
B C D A	2	2	484 ***	174	18	23	58	112	491 ***	134 ***	3 *	262 ***	2101
b c d e	0	3	340 ***	119 **	19	13	75 *	64	371 ***	71 ***	3 *	85 ***	812
B C D E	0	0	149 ***	57 **	2	0	10	16	186 ***	24 *	1	67 ***	318
b c d j	0	2	47	107	3	15	22	303 ***	229	27	1	5	2454 ***
B C D J	0	0	12	30	0	3	1	78	52	11	1	3	755 ***
b c e	0	0	36	10	5	2	16 *	24	53 ***	10	0	5	157
B C E	0	0	8	3	0	0	4 *	1	8	2	0	4 *	30
b c j	0	0	9	17	0	5	13	110 ***	28	4	0	0	544 ***
B C J	0	0	2	5	0	0	0	19 *	2	1	0	0	128 ***
b c j a	0	3	31	57	4	13	10	221 ***	114	13	0	5	1803 ***
B C J A	0	0	20	52	0	2	4	102 *	67	12	0	1	985 ***
b d	3	2	100 **	52 *	27 **	15	28	32	84 *	8	0	4	420
B D	0	2	19	16 *	6	4	4	6	23	7	0	0	131
b e	1	2	41 *	15	3	2	28 ***	13	58 ***	3	0	1	138
B E	0	0	56 ***	15	3	0	17 *	6	83 ***	13 *	0	2	120
b j	0	3	13	30	1	5	11	116 ***	48	4	0	1	966 ***
B J	0	2	9	24	0	4	6	106 **	42	3	0	0	968 ***
b j a	0	2	7	35	0	4	19	168 ***	57	2	0	0	1268 ***
B J A	0	0	5	26	0	4	6	82 *	43	1	0	0	817 ***
b j e	0	0	6	20	0	2	11	94 ***	45	5	0	0	606 ***
B J E	0	0	13	30	0	0	2	62	46	2	0	1	623 ***
c	1	3	33 *	14	8 *	6	13 *	17	18	3	0	3	102
C	0	0	23 ***	4	3	0	7 *	5	8	4	0	2	55
c d	3	1	198 ***	48	22	17	24	31	107 **	54 ***	1	18	371
C D	0	0	139 ***	42 **	6	2	15	16	64 *	57 ***	0	52 ***	179
d	6 ***	22 ***	72 *	25	41 ***	65 ***	26 *	28	26	12	0	4	226
D	6 ***	14 ***	29	15	22 ***	47 ***	20 **	12	21	14 **	0	7	136
d g	0	1	152 ***	43 ***	14 *	9	41 ***	12	44	21 ***	0	9	141
D G	0	0	90 ***	21 *	6	1	19 **	4	50 ***	31 ***	1 *	5	84
d h	10 ***	18 ***	84	43	93 ***	135 ***	29	20	52	18	0	5	393
D H	0	2	16	17 ***	17 ***	9 **	3	4	11	9 **	0	1	55
d h g	9 **	3	401 ***	216 ***	126 ***	50 *	58	19	139	72 ***	0	10	618
D H G	0	0	78 ***	53 ***	17 **	4	6	5	40	25 ***	0	0	163
d j	0	1	21	58	1	14	29	147 ***	95	19	0	0	861 ***
D J	0	0	36	76 **	0	3	19	103 **	144 ***	40 ***	0	0	678 **
e	0	0	33 *	12	3	5	26 ***	15	42 ***	7	0	1	83
E	0	0	152 ***	30	9	4	34 ***	11	144 ***	31 ***	1	21 ***	123
g	0	0	139 ***	32 ***	15 **	0	38 ***	4	28	6	0	8	53
G	0	0	138 ***	18	4	2	20 ***	2	42 ***	5	0	7	30
h	18 ***	48 ***	97	54	83 ***	169 ***	69 ***	87	73	13	0	5	526
H	9 ***	32 ***	47	37	72 ***	157 ***	25	34	51	6	0	4	433
h e g	0	1	294 ***	64 ***	44 ***	10	51 ***	6	156 ***	45 ***	0	11	168
H E G	0	0	144 ***	33 **	9	4	17	3	90 ***	30 ***	0	5	94
h g	4	1	397 ***	103 ***	83 ***	30	62 ***	18	127 *	27	0	9	346
H G	1	0	223 ***	88 ***	33 ***	11	38 ***	17	94 **	22 *	0	4	215
h i	1	8 **	64 ***	25	28 ***	55 ***	25 ***	10	32	5	0	2	161
H I	1	3	55 ***	36 ***	22 ***	23 ***	9	4	29	4	0	1	152
i	2 *	7 ***	28 *	12	9 **	13 ***	4	14	15	2	0	1	70
I	1	3	53 ***	16 *	6	14 ***	9	11	30 *	4	0	4	80
j	0	2	7	14	1	10	13	149 ***	36	3	0	0	695 ***
J	1	3	17	33	1	8	30	420 ***	90	0	0	0	2129 ***
j a i	1	3	5	11	1	11	7	37 *	29	4	0	2	279 ***
J A I	2	2	8	10	3	5	4	33	48	3	0	2	411 ***
j e	0	0	12	18	1	1	13	94 ***	44	7	0	1	466 ***
J E	0	0	7	31	1	2	9	70 **	55	8	0	0	530 ***
j h	1	7	36	110	5	28	36	222 ***	125	15	0	1	1746 ***
J H	0	5	52	149 ***	5	19	28	125	204	37	0	0	1404 ***
j i	0	1	7	12	3	10	15	64 ***	29	2	0	0	366 ***
J I	0	0	8	21	2	7	9	43 *	31	0	0	0	343 ***
k	0	0	29 ***	5	6 **	1	6 *	0	4	1	0	1	11
K	1	2	29 ***	8	12 ***	14 ***	6	2	17	2	0	1	53
none	21 ***	110 ***	223	111	105 ***	225 ***	242 ***	498 ***	162	24	0	7	1416
